# Supplementary material for: Bacillus subtilis variant natto Bacteremia of Gastrointestinal Origin, Japan
Source: PubMed Central journal article supplement (PMC9328918; doi:10.3201/eid2808.211567), 2022-08
Supplement: 21-1567-Techapp-s1.pdf [file 21-1567-Techapp-s1.pdf]

# *Bacillus subtilis* variant *natto* Bacteremia of Gastrointestinal Origin, Japan

## Appendix

**Appendix Table.** Minimum inhibitory concentrations of each antimicrobial agent and their interpretation against the *Bacillus subtilis* var. *natto* strains isolated from the patient\*

| Antimicrobial agent | MIC (µg/mL) | Interpretation† |
|---------------------|-------------|-----------------|
| Penicillin G        | ≤0.12       | S               |
| Ampicillin          | ≤0.06       | S               |
| Imipenem            | ≤1          | S               |
| Gentamicin          | ≤1          | S               |
| Erythromycin        | ≤0.25       | S               |
| Clindamycin         | ≤0.25       | S               |
| Levofloxacin        | ≤0.5        | S               |

\*MIC, minimum inhibitory concentration; S, susceptible; R, resistant.

†Interpretation (susceptible, intermediate, or resistant) was based on the Clinical and Laboratory Standards Institute criteria (M45).

|              |     |                                                              |     |
|--------------|-----|--------------------------------------------------------------|-----|
| The isolate  | 1   | GTGTTTATCCTGACATTGTGATCGGCACCTTAAGCAAAGCTGTTGGTACGGAAGGAGGTT | 60  |
|              |     |                                                              |     |
| <i>natto</i> | 1   | GTGTTTATCCTGACATTGTGATCGGCACCTTAAGCAAAGCTGTTGGTACGGAAGGAGGTT | 60  |
| The isolate  | 61  | TTGCGGCTGGATCAGCGGTCTTCATCGACTTTTTGCTGAACCATGCCAGAACATTTATCT | 120 |
|              |     |                                                              |     |
| <i>natto</i> | 61  | TTGCGGCTGGATCAGCGGTCTTCATCGACTTTTTGCTGAACCATGCCAGAACATTTATCT | 120 |
| The isolate  | 121 | TTCAAACCGCTATTCGCCAGCCAGCTGTGCGGCTGCTCACGAGGCTTTCAACATCAGAA  | 180 |
|              |     |                                                              |     |
| <i>natto</i> | 121 | TTCAAACCGCTATTCGCCAGCCAGCTGTGCGGCTGCTCACGAGGCTTTCAACATCAGAA  | 180 |
| The isolate  | 181 | CCAGTTTGAAGAATATGGGTTATGTGGTGAAGGAGATCACACCCGATTATTCCTGTAG   | 240 |
|              |     |                                                              |     |
| <i>natto</i> | 181 | CCAGTTTGAAGAATATGGGTTATGTGGTGAAGGAGATCACACCCGATTATTCCTGTAG   | 240 |
| The isolate  | 241 | TCATTGGCGATGCCCATAAAACGGTCATATTTGCTGAAAACTGCAGGGCAAGGGAATTT  | 300 |
|              |     |                                                              |     |
| <i>natto</i> | 241 | TCATTGGCGATGCCCATAAAACGGTCATATTTGCTGAAAACTGCAGGGCAAGGGAATTT  | 300 |
| The isolate  | 301 | ATGCTCCTGCCATTCGGCCGCCGACCGTTGCGCCGGGTGAAAAG                 | 343 |
|              |     |                                                              |     |
| <i>natto</i> | 301 | ATGCTCCTGCCATTCGGCCGCCGACCGTTGCGCCGGGTGAAAAG                 | 343 |

**Appendix Figure 1.** The isolate showed 100% homology to *Bacillus subtilis* var. *natto* standard strain in the *bioF* sequence. *natto*, *Bacillus subtilis* var. *natto* standard strain.

|                 |     |                                                              |     |
|-----------------|-----|--------------------------------------------------------------|-----|
| The isolate     | 1   | GTGTTTATCCTGACATTGTGATCGGCACCTTAAGCAAAGCTGTTGGTACGGAAGGAGGTT | 60  |
| <i>subtilis</i> | 1   | GTGTTTGTCTGACATTGTGATCGGCACCTTAAGCAAAGCTGTTGGCGCGAAGGAGGTT   | 60  |
| The isolate     | 61  | TTGCGGCTGGATCAGCGGTCTTCATCGACTTTTGTGAACCATGCCAGAACATTTATCT   | 120 |
| <i>subtilis</i> | 61  | TTGCGGCAGGATCAGCGGTCTTCATCGACTTTTGTGAACCATGCCAGAACATTTATCT   | 120 |
| The isolate     | 121 | TTCAAACCGCTATTCCGCCAGCCAGCTGTGCGGCTGCTCACGAGGCTTTCAACATCA    | 177 |
| <i>subtilis</i> | 121 | TTCAAACCGCTATTCCGCCAGCCAGCTGTGCGGCTGCTCACGAGGCTTTCAACATCA    | 177 |
| The isolate     | 174 | ATCAGAACCAGTTTGAAGAATATGGGTTATGTGGTAAAAGGAGATCACACCCGATTATT  | 233 |
| <i>subtilis</i> | 228 | ATCAGAACCAGTCTGAAGAATATGGGTTATGTCGTAAAAGGAGATCACACCCGATTATT  | 287 |
| The isolate     | 234 | CCTGTAGTCATTGGCGATGCCATAAAACGGTCATATTTGCTGAAAACTGCAGGGCAAG   | 293 |
| <i>subtilis</i> | 288 | CCCGTGGTCATTGGCGATGCCATAAAACGGTCCTATTTGCTGAAAACTGCAGGGCAAG   | 347 |
| The isolate     | 294 | GGAATTTATGCTCCTGCCATTCGGCCGCCGACCGTTGCGCCGGGTGAAAG           | 343 |
| <i>subtilis</i> | 348 | GGAATTTTGTCTCCTGCCATTCGGCCGCCGACCGTTGCGCCAGGTGAAAG           | 397 |

**Appendix Figure 2.** The isolate showed a 50-nt deletion in the *bioF* sequence compared to *Bacillus subtilis* subsp. *subtilis* standard strain. *subtilis*, *Bacillus subtilis* subsp. *subtilis* standard strain.

|              |     |                                                              |     |
|--------------|-----|--------------------------------------------------------------|-----|
| The isolate  | 1   | TGCGCTCGCTTCAAAGGTAAGCCGGCACCCGGCAGCCATTGCAGAATTATGCTGGTCCGA | 60  |
| <i>natto</i> | 1   | TGCGCTCGCTTCAAAGGTAAGCCGGCACCCGGCAGCCATTGCAGAATTATGCTGGTCCGA | 60  |
| The isolate  | 61  | CGATCCGGATTACATAACAGGCTATGTTGCGGGTAAGAAAATGGGCTATCAGCGTATTAC | 120 |
| <i>natto</i> | 61  | CGATCCGGATTACATAACAGGCTATGTTGCGGGTAAGAAAATGGGCTATCAGCGTATTAC | 120 |
| The isolate  | 121 | AGCAATGAAAGAATACGGGACTGAAGAGGGCTGACGAGTCTTTTTTATTGATGGATCCAA | 180 |
| <i>natto</i> | 121 | AGCAATGAAAGAATACGGGACTGAAGAGGGCTGACGAGTCTTTTTTATTGATGGATCCAA | 180 |
| The isolate  | 181 | TGATGTAAACACGTACATACATGATCTGGAGAAGCAGCCTATTTTAATAGAGTGGGAGG  | 239 |
| <i>natto</i> | 181 | TGATGTAAACACGTACATACATGATCTGGAGAAGCAGCCTATTTTAATAGAGTGGGAGG  | 239 |

**Appendix Figure 3.** The isolate showed 100% homology to *Bacillus subtilis* var. *natto* standard strain in the *bioW* sequence. *natto*, *Bacillus subtilis* var. *natto* standard strain.
